# Supplementary material for: The Methyl-CpG-Binding Protein Mbd2 Regulates Susceptibility to Experimental Colitis via Control of CD11c+ Cells and Colonic Epithelium
Source: Front Immunol. 2020 Feb 14;11:183. doi: 10.3389/fimmu.2020.00183 (PMC7033935; doi:10.3389/fimmu.2020.00183)
Supplement: Supplementary file 2 [file Table_2.XLSX]

## Sheet: Sheet1
Ontology	GO_ID	Goterm	Enrich_pValue	Symbol
Up-regulated
BP	GO:0006575	cellular amino acid derivative metabolic process	1.31e-05	Fabp3, Ido1, Mgst1, Slc1a3, Vnn3
BP	GO:0006519	cellular amino acid and derivative metabolic process	2.29e-05	Arg1, Fabp3, Ido1, Mgst1, Slc1a3, Vnn3
BP	GO:0044281	small molecule metabolic process	0.000436	Apoc1, Arg1, Fabp3, Gde1, Ido1, Mgst1, Mpi, Myh10, Slc1a3, Vnn3
BP	GO:0015909	long-chain fatty acid transport	0.000539	Fabp3, Plin2
CC	GO:0005576	extracellular region	0.000763	Angptl7, Apoc1, Arg1, C6, Creld2, Lyz1, Pdyn, Slc1a3, Vegfa, Vnn3
Down-regulated
CC	GO:0044444	cytoplasmic part	4.96e-06	Abcb1b, Agxt2l2, Akr1c18, Anxa2, Atp6v0a1, Cetn4, Chst3, Chst7, Clns1a, Ebpl, Fam3c, Ilk, Lass5, Ltc4s, Mmd, Mrpl33, Mterf, Nars, Nup210, Olfm1, Pstpip1, Rrm2b, Scoc, Sfxn3, Soat2, Spp1, Syn1, Synj2, Tmem55a, Tram1, Vamp4, Wls
CC	GO:0001725	stress fiber	5.45e-06	Anxa2, Ilk, Pdlim7, Pstpip1
CC	GO:0032432	actin filament bundle	6.99e-06	Anxa2, Ilk, Pdlim7, Pstpip1
CC	GO:0042641	actomyosin	8.83e-06	Anxa2, Ilk, Pdlim7, Pstpip1
MF	GO:0008459	chondroitin 6-sulfotransferase activity	1.45e-05	Chst3, Chst7
CC	GO:0005737	cytoplasm	1.62e-05	Abcb1b, Agxt2l2, Akr1c18, Anxa2, Arap3, Atp6v0a1, Cetn4, Chst3, Chst7, Clns1a, E2f5, Ebpl, Fam3c, Ilk, Lass5, Ltc4s, Lxn, Mmd, Mrpl33, Mterf, Nars, Nav1, Nup210, Olfm1, Pdlim7, Pid1, Pstpip1, Rrm2b, Scoc, Sfxn3, Smo, Soat2, Spp1, Syn1, Synj2, Tle1, Tmem55a, Tram1, Trib2, Ugp2, Vamp4, Wls
CC	GO:0005622	intracellular	2.55e-05	4930432O21Rik, Abcb1b, Agxt2l2, Akr1c18, Anxa2, Arap3, Arhgap18, Atp6v0a1, Bcl6, Cetn4, Chn2, Chst3, Chst7, Clns1a, E2f5, Ebpl, Fam3c, Htatsf1, Ilk, Lass5, Lbr, Ltc4s, Lxn, Matr3, Mmd, Mrpl33, Mterf, Mtf2, Nars, Nav1, Nup210, Olfm1, Pdlim7, Pid1, Pstpip1, Rrm2b, Scoc, Sfxn3, Smo, Soat2, Spp1, Srsf2, ... and others
MF	GO:0034481	chondroitin sulfotransferase activity	4.34e-05	Chst3, Chst7
CC	GO:0043226	organelle	7.55e-05	4930432O21Rik, Abcb1b, Agxt2l2, Anxa2, Arap3, Atp6v0a1, Bcl6, Cetn4, Chst3, Chst7, Clns1a, E2f5, Ebpl, Fam3c, Htatsf1, Ilk, Lass5, Lbr, Ltc4s, Matr3, Mmd, Mrpl33, Mterf, Mtf2, Nars, Nav1, Nup210, Olfm1, Pdlim7, Pstpip1, Rrm2b, Scoc, Sfxn3, Soat2, Spp1, Srsf2, Syn1, Synj2, Tle1, Tmem55a, Tram1, Trib2 ... and others
CC	GO:0044424	intracellular part	8.29e-05	4930432O21Rik, Abcb1b, Agxt2l2, Akr1c18, Anxa2, Arap3, Atp6v0a1, Bcl6, Cetn4, Chst3, Chst7, Clns1a, E2f5, Ebpl, Fam3c, Htatsf1, Ilk, Lass5, Lbr, Ltc4s, Lxn, Matr3, Mmd, Mrpl33, Mterf, Mtf2, Nars, Nav1, Nup210, Olfm1, Pdlim7, Pid1, Pstpip1, Rrm2b, Scoc, Sfxn3, Smo, Soat2, Spp1, Srsf2, Syn1, Synj2, Tl ... and others
Supplemementary Table 2. Gene ontology analysis of DSS treated Mbd2-/- and WT colon LP macrophages
