# Supplementary material for: The Methyl-CpG-Binding Protein Mbd2 Regulates Susceptibility to Experimental Colitis via Control of CD11c+ Cells and Colonic Epithelium
Source: Front Immunol. 2020 Feb 14;11:183. doi: 10.3389/fimmu.2020.00183 (PMC7033935; doi:10.3389/fimmu.2020.00183)
Supplement: Supplementary file 3 [file Table_3.xlsx]

## Sheet: Sheet1
	Target	Fluorochrome	Clone	Dilution	Source
	CD103	BV421	M290	1/400	BD biosciences
	FoxP3	e450	FJK-16s	1/200	eBioscience
	MHC-II	e450	M5/114.15.2	1/200	eBioscience
	Rat IgG1	BV421	RTK2071	1/200	BD biosciences
	Rat IgG1	e450	eBRG1	1/200	eBioscience
	Rat IgG2b	e450	eB19/10H5	1/200	eBioscience
	Rat IgG2a	e450	eBR2a	1/200	eBioscience
	CD45	BV510	30-F11	1/400	BD biosciences
	CD11c	BV605	N418	1/600	BD biosciences
	CD11b	BV711	M1/70	1/300	BD biosciences
	Rat IgG2b	BV711	RTK4530	1/300	BD biosciences
	Rat IgG2a	BV605	RTK2758	1/400	BD biosciences
	Rat IgG2a	BV650	RTK2758	1/400	BD biosciences
	CD45	Alexa700	30-F11	1/200	Biolegend
	EpCAM	PE	G8.8	1/400	eBioscience
	MHC-II	Alexa700	M5/114.15.2	1/200	Biolegend
	SiglecF	PE-CF594	E50-2440	1/400	Biolegend
	CD19	e780	eBio1D3	1/200	eBioscience
	CD11b	PE	M1/70	1/200	eBioscience
	CD64	PE	X54-5/7.1	1/200	BD biosciences
	Rat IgG2a	PE	N/A	1/200	BD biosciences
	Rat IgG2b	PE	eB149/10H5	1/200	BD biosciences
	Rat IgG2a	PE-CF594	R35-95	1/200	Biolegend
	CD25	PerCP Cy5.5	PC61	1/200	eBioscience
	Ly6G	PerCP Cy5.5	1A8	1/400	eBioscience
	EpCAM	PerCP Cy5.5	G8.8	1/400	eBioscience
	Ly6C	A700	HK1.4	1/400	eBioscience
	Rat IgG2a	A700	RTK2758	1/400	BD biosciences
	CD3	e780	17A2	1/200	BD biosciences
	CD11b	e780	M1/70	1/200	BD biosciences
	Ly6G	APC/Cy7	1A8	1/200	BD biosciences
	NK1.1	e780	PK136	1/200	BD biosciences
	TCRb	e780	H57-597	1/200	BD biosciences
	Ter119	e780	TER-119	1/200	BD biosciences
	Rat IgG2a	e780	eBR2a	1/200	BD biosciences
	Rat IgG2b	e780	N/A	1/200	BD biosciences
	MerTk	Biotinylated	N/A	1/100	Goat IgG RD systems
	F4/80	APC	BM8	1/400	Biolegend
	F4/80	PECy7	BM8	1/400	BD biosciences
	Ly6C	PECy7	HK1.4	1/600	BD biosciences
	Rat IgG2a	PECy7	N/A	1/200	BD Pharmigen
	Rat IgG2a	APC	RTK2758	1/200	BD biosciences
	MHC-II	FITC	M5/114.15.2	1/800	BD biosciences
	IL-1b	FITC	NJTEN3	1/200	BD biosciences
	Supplementary Table 3. Antibody clone details & dilutions used in flow cytometry
